# Supplementary material for: Simple colorimetric detection of Cr(iii) in aqueous solutions by as synthesized citrate capped gold nanoparticles and development of a paper based assay
Source: Royal Society of Chemistry journal article supplement (doi:10.1039/c3ay41435c), 2013-01-01
Supplement: c3ay41435c.pdf [file c3ay41435c.pdf]

1        **Simple colorimetric detection of Cr (III) in the aqueous solutions by the as synthesized**  
2                    **citrate capped gold nanoparticles and development of a paper based assay**

3  
4  
5  
6

7                    Elavarasi . M, Rajeshwari A, N. Chandrasekaran, and Amitava Mukherjee

8  
9

Centre for Nanobiotechnology, VIT University, Vellore, India

10                    Supplementary information

11  
12  
13  
14  
15

16    **\*Corresponding author**

17    **Dr. Amitava Mukherjee**

18    **Senior Professor & Assistant Director**

19    **Centre for Nanobiotechnology**

20    **VIT University, Vellore - 632014**

21    **Email: [amit.mookerjea@gmail.com](mailto:amit.mookerjea@gmail.com)**

22    **Phone: 91 416 2202620**

23    **Fax: 91-416-2243092**

24 **Results:**

25

26 **Table S1. The effect of pH on UV-visible intensity measured at a range of Cr (III)**

27 **concentrations [range:  $10^{-3}$  M -  $10^{-6}$  M], with a mixing ratio of 700  $\mu$ l of AuNP: 500 $\mu$ l of Cr**

28 **(III)**

| pH | Different Cr (III) concentrations |                   |                   |                   |
|----|-----------------------------------|-------------------|-------------------|-------------------|
|    | $10^{-3}$ M                       | $10^{-4}$ M       | $10^{-5}$ M       | $10^{-6}$ M       |
| 3  | 0.716 $\pm$ 0.006                 | 0.578 $\pm$ 0.004 | 0.432 $\pm$ 0.012 | 0.32 $\pm$ 0.004  |
| 4  | 0.317 $\pm$ 0.002                 | 0.382 $\pm$ 0.007 | 0.192 $\pm$ 0.005 | 0.062 $\pm$ 0.002 |
| 5  | 0.467 $\pm$ 0.008                 | 0.412 $\pm$ 0.005 | 0.451 $\pm$ 0.007 | 0.129 $\pm$ 0.012 |

46

47

48

49

50

51

52

53

54

55

56

57

58

59

60

61

62

63

64

65

66

67  
68  
69 **Table S2. Selectivity of the analytical process measured using UV-vis spectrophotometer:**  
70 **The AuNPs at pH 4 interacted with different metal ions Cr (III), Cr (VI), Cd (II), Co (II),**  
71 **Hg (II), Mg (II), Mn (II), Ni (II), Fe (III), Zn (II), Cu (II), Al (II), Pb (II) of  $10^{-3}$ M**  
72 **concentrations at pH 3 with a mixing ratio of 700  $\mu$ l of AuNP: 500 $\mu$ l of metal ion.**

73

| Heavy metals | $A_{714}/A_{526}$ |       |       | Mean  | Std Deviation | Standard Error |
|--------------|-------------------|-------|-------|-------|---------------|----------------|
|              | R1                | R2    | R3    |       |               |                |
| Cr (III)     | 0.716             | 0.714 | 0.718 | 0.716 | 0.002         | 0.001          |
| Cr (VI)      | 0.053             | 0.054 | 0.056 | 0.054 | 0.001         | 0.0007         |
| Cd (II)      | 0.052             | 0.059 | 0.051 | 0.054 | 0.004         | 0.002          |
| Co (II)      | 0.081             | 0.08  | 0.085 | 0.082 | 0.002         | 0.001          |
| Hg (II)      | 0.072             | 0.075 | 0.072 | 0.073 | 0.001         | 0.000          |
| Mg (II)      | 0.081             | 0.082 | 0.084 | 0.082 | 0.001         | 0.000          |
| Mn (II)      | 0.051             | 0.051 | 0.053 | 0.051 | 0.0015        | 0.0005         |
| Ni (II)      | 0.059             | 0.054 | 0.054 | 0.055 | 0.002         | 0.001          |
| Fe (II)      | 0.074             | 0.07  | 0.071 | 0.071 | 0.002         | 0.001          |
| Al (II)      | 0.058             | 0.059 | 0.057 | 0.058 | 0.001         | 0.0005         |
| Cu (II)      | 0.06              | 0.062 | 0.06  | 0.060 | 0.001         | 0.0006         |
| Pb (II)      | 0.184             | 0.183 | 0.185 | 0.184 | 0.001         | 0.0005         |
| Zn (II)      | 0.021             | 0.02  | 0.024 | 0.021 | 0.002         | 0.001          |

74  
75  
76

77  
78  
79

80 **Table S3. Interfering effect of Pb (II) on the analytical process measured using UV-vis**  
81 **spectrophotometer: The AuNPs at pH 4 interacted with Pb (II) of  $10^{-3}$  M concentrations at**  
82 **pH 3 with a mixing ratio of 700  $\mu$ l of AuNP: 500 $\mu$ l of metal ions.**

83

| Heavy metal | $A_{714}/A_{526}$ |       |       |      |       |       |       |       |       |       | Mean  | SD    | SE    |
|-------------|-------------------|-------|-------|------|-------|-------|-------|-------|-------|-------|-------|-------|-------|
|             | R1                | R2    | R3    | R4   | R5    | R6    | R7    | R8    | R9    | R10   |       |       |       |
| Pb (II)     | 0.184             | 0.187 | 0.178 | 0.18 | 0.189 | 0.178 | 0.182 | 0.188 | 0.185 | 0.187 | 0.183 | 0.004 | 0.001 |

84

85  
86 **Table S4. Selectivity of the analytical process measured using UV-vis spectrophotometer:**  
87 **The AuNPs at pH 4 interacted with Cr (III) in the artificial mixture of heavy metals [Cr**  
88 **(VI), Cd (II), Co (II), Hg (II), Mg (II), Mn (II), Ni (II), Fe (III), Zn (II), Cu (II), Al (II), Pb**  
89 **(II) ] at  $10^{-3}$  M concentrations with a mixing ratio of 700  $\mu$ l AuNP to 500 $\mu$ l metal ions.**

90  
91

| Artificial mixture of Heavy metals | $A_{714}/A_{526}$ |       |       |       |       | Mean  | SD    | SE    |
|------------------------------------|-------------------|-------|-------|-------|-------|-------|-------|-------|
|                                    | R1                | R2    | R3    | R4    | R5    |       |       |       |
|                                    | 0.637             | 0.655 | 0.667 | 0.642 | 0.648 | 0.649 | 0.011 | 0.005 |

92  
93  
94  
95  
96  
97  
98  
99  
100

101  
102 **Table S5. Color intensity in the Paper based assay measured using Adobe photoshop CS6:**  
103 **Cr (III) response in the artificial mixture of heavy metals [Cr (VI), Cd (II), Co (II), Hg (II),**  
104 **Mg (II), Mn (II), Ni (II), Fe (III), Zn (II),Cu (II),Al (II), Pb (II)] at $10^{-3}$  M concentrations,**  
105 **with a mixing ratio of 7  $\mu$ l AuNP to 3 $\mu$ l metal ions**

106  
107  
108

| Artificial mixture of Heavy metals | R1 | R2 | R3 | R4 | R5 | Mean | SD   | SE   |
|------------------------------------|----|----|----|----|----|------|------|------|
|                                    | 43 | 40 | 48 | 36 | 45 | 42   | 4.61 | 2.06 |

109  
110  
111  
112  
113  
114  
115  
116  
117  
118  
119  
120  
121  
122  
123

124

125 **Figure S1. Selectivity of the process in mixture of Cr (III) and Cr (VI): The AuNPs at pH 4**  
126 **interacted with the mixture of Cr(III) and Cr (VI) of  $10^{-3}$ M concentrations at pH 3 with a**  
127 **mixing ratio of 700  $\mu$ l of AuNP: 500 $\mu$ l of metal ions.**

128

129

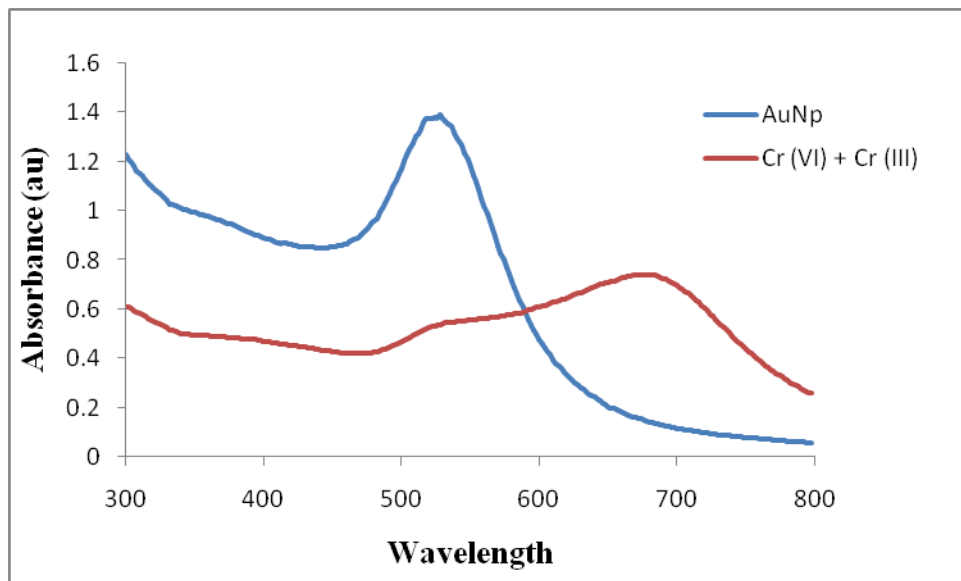

130

131

132
